# Supplementary material for: Co-Ingestion of Natal Plums (Carissa macrocarpa) and Marula Nuts (Sclerocarya birrea) in a Snack Bar and Its Effect on Phenolic Compounds and Bioactivities
Source: MDPI journal article supplement (doi:10.3390/molecules27010310), 2022-01-04
Supplement: s1 [file s1]

# Supplementaru Material

## Co-ingestion of Natal Plums (*Carissa macrocarpa*) and Marula Nuts (*Sclerocarya birrea*) in a Snack Bar and Its Effect on Phenolic Compounds and Bioactivities

Vimbainashe E. Manhivi <sup>1</sup> Retha M. Slabbert <sup>2</sup> and Dharini Sivakumar <sup>1,\*</sup>

<sup>1</sup>Phytochemical Food Network Group, Department of Crop Sciences, Tshwane University of Technology, Pretoria West 0001, South Africa; ManhiviVE@tut.ac.za

<sup>2</sup>Department of Horticulture, Tshwane University of Technology, Pretoria West 0001, South Africa; SlabbertMM@tut.ac.za

\* Correspondence: SivakumarD@tut.ac.za

**Table S1.** Regression equation, correlation coefficient (R<sup>2</sup>), limit of detection (LOD), limit of quantitation (LOQ) of phenolic compounds by UHPLC/Q-TOF-MS.

| Phenolic compounds             | Retention time(min) | Regression equation | R <sup>2</sup> | LOD (µg/mL) | LOQ (µg/mL) |
|--------------------------------|---------------------|---------------------|----------------|-------------|-------------|
| Gallic acid                    | 10.197              | y = 99324x + 55626  | 0.998          | 0.05        | 0.19        |
| Protocatechuic acid            | 10.855              | y = 19722x - 341718 | 0.998          | 3.2         | 10.9        |
| Catechin                       | 11.84               | y = 2828x - 69172   | 0.999          | 3.2         | 15.7        |
| Epicatechin                    | 14.2                | y = 35316x + 193517 | 0.997          | 1.4         | 3.3         |
| Caffeic acid                   | 14.509              | y = 28189x - 161653 | 0.999          | 2.2         | 7.2         |
| Chlorogenic acid               | 14.724              | y = 71930x - 2110,5 | 0.995          | 0.11        | 0.37        |
| Quercetin                      | 16.77               | y = 12091x - 170181 | 0.996          | 7.7         | 25.8        |
| Ferulic acid                   | 17.93               | y = 20067x - 279209 | 0.999          | 3.3         | 11.9        |
| p-Coumaric acid                | 17.54               | y = 6925.3x - 62646 | 0.999          | 10.25       | 34.17       |
| Kaempferol                     | 16.448              | y = 26658x + 492185 | 0.996          | 2.7         | 9.3         |
| Syringic acid                  | 15.44               | y = 75813x - 107617 | 0.999          | 0.05        | 0.18        |
| Ellagic acid                   | 15.996              | y = 20110x + 9484.9 | 0.997          | 0.31        | 1.2         |
| Cyanidin-3-sambubioside        |                     | y = 1.958x + 1.619  | 0.99           | 0.12        | 0.47        |
| Cyanidin-3-O-glucoside content |                     | y = 1.825x + 0.538  | 0.99           | 0.03        | 0.25        |

**Table S2.** Identification and quantification of anthocyanins using UPLC/QTOF/MS.

| Average Rt(min) | Molecular Formula                               | Expected Mass m/z | Observed Average m/z | Tentative Compound Name   |
|-----------------|-------------------------------------------------|-------------------|----------------------|---------------------------|
| 13.43           | C <sub>26</sub> H <sub>29</sub> O <sub>15</sub> | 581.5             | 579.12872            | Cyanidin 3-O-Sambubioside |
| 15.822          | C <sub>21</sub> H <sub>22</sub> O <sub>11</sub> | 449.1083          | 449.10825            | Cyanidin 3-O-Glucoside    |
